# Supplementary material for: Pathology Trainees’ Experience and Attitudes on Use of Digital Whole Slide Images
Source: PubMed Central journal article supplement — Acad Pathol. 2020 Sep 30;7:2374289520951922. doi: 10.1177/2374289520951922 (PMC7545516; doi:10.1177/2374289520951922), 2020-09-30
Supplement: Supplemental_Appendix_1.pdf [file Supplemental_Appendix_1.pdf]

Pathology Trainees Experience and Attitudes on  
Use of Digital Whole Slide Images

**Supplemental Appendix 1: Baseline Survey**

**SURVEY OF RESIDENTS IN PATHOLOGY**

**MEDICAL TRAINING**

1. **Where did you attend medical school?**  
\_\_\_\_\_
2. **Did you complete a post-sophomore pathology fellowship year in medical school?**
  - Yes     No
  - I am currently a post-sophomore fellow
3. **In addition to viewing PowerPoint slides during medical school histology/pathology training, how many hours did you spend using glass slides and/or digital images? (For example, a semester long course with a 2-3 hour lab per week is approximately 25-30 hours) Please estimate the number of hours you spent using:**
  - a. A traditional microscope with glass slides:  1-5 hours
    - 6-10 hours
    - 11-25 hours
    - 26-50 hours
    - 51-100 hours
    - > 100 hours
    - I never used a traditional microscope with glass slides
  - b. Digital whole slide images (virtual microscope with pan and zoom viewing on a computer monitor):

- 1-5 hours
- 6-10 hours
- 11-25 hours
- 26-50 hours
- 51-100 hours
- > 100 hours
- I never used digital whole slide imaging

**4. When did you begin residency training in pathology? (dropdown response)**

\_\_\_\_\_ (month) \_\_\_\_\_ (year)

- N/A (student fellow)

|                  |
|------------------|
| <b>RESIDENCY</b> |
|------------------|

**5. What is your current year of pathology residency training?**

- First year       Second year       Third year       Fourth year
- N/A (post-sophomore/student fellow)       Fifth year or higher

**6. Do you think you will attend any of the following meetings in the next 12 months?**

- USCAP (United States and Canadian Academy of Pathology)
- CAP (College of American Pathologists)
- ASCP (American Society for Clinical Pathology)
- Other \_\_\_\_\_
- No meetings in the next 12 months

**7. Approximately how many months of training in surgical pathology have you had during your residency and/or fellowship to date?**

- < 1 month                       9-10 months                       22-24 months
- 1-2 months                       11-12 months                       > 24 months
- 3-4 months                       13-15 months
- 5-6 months                       16-18 months
- 7-8 months                       19-21 months

**8. Approximately how many weeks of training in breast pathology have you had during your residency and/or fellowship to date? (dropdown response)**

- < 1 week
- 1-4 weeks
- 5-7 weeks
- 8-16 weeks

>16 weeks

**9. Estimate the number of breast cases you have reviewed thus far in your residency and/or fellowship: (dropdown response)**

- < 10 cases
- 10-25 cases
- 26-50 cases
- 51-100 cases
- 101-250
- 251-500
- 500+

**BREAST PATHOLOGY**

**10. What are your thoughts on interpreting breast pathology?**

|                                                                                       | <b>Strongly disagree</b> | <b>Disagree</b>          | <b>Slightly disagree</b> | <b>Slightly agree</b>    | <b>Agree</b>             | <b>Strongly agree</b>    |
|---------------------------------------------------------------------------------------|--------------------------|--------------------------|--------------------------|--------------------------|--------------------------|--------------------------|
|                                                                                       | <b>1</b>                 | <b>2</b>                 | <b>3</b>                 | <b>4</b>                 | <b>5</b>                 | <b>6</b>                 |
| A. Interpreting breast pathology makes me more nervous than other types of pathology. | <input type="checkbox"/> |
| B. Breast cases are challenging to interpret.                                         | <input type="checkbox"/> |
| C. I am confident in my assessments of breast cases.                                  | <input type="checkbox"/> |

**11. Do you intend to specialize in surgical pathology?**

- Yes
- No
- Unsure





The vastness of the information physicians are expected to know overwhelms me.

I frequently wish I had gone into a specialty or subspecialty that would minimize the uncertainties of patient care.

I am quite comfortable with the uncertainty in patient care.

## GENERAL PROFESSIONAL INFORMATION

17. What is your year of birth? \_\_\_\_ \_\_\_\_ \_\_\_\_ \_\_\_\_ Year

18. Which gender do you identify with?

- Male
- Female
- Other
- Prefer not to answer

19. Which one of these groups would you say best represents your race?

- White
- Black or African American
- Asian
- American Indian/Alaska Native/Native Hawaiian/Other Pacific Islander
- > one race
- Don't know/Not sure
- Decline to Answer

20. Are you Hispanic or Latino?

- No
- Yes
- Don't know/Not sure
- Decline to Answer
